# Supplementary material for: A DFT study on the mechanism of a novel, regioselective, intramolecular N–π rearrangement of cis and trans-η1-N-Cp*Rh-hydroxytamoxifen complexes to their η6 derivatives; potential breast cancer pharmaceuticals, and fluorescent probes
Source: Royal Society of Chemistry journal article supplement (doi:10.1039/b819474b), 2009-01-01
Supplement: b819474b.pdf [file b819474b.pdf]

**Supporting Information (2 pages) for the manuscript:**

I. Efremenko,\* S. Top, J. M. L. Martin, R. H. Fish\*

Bioorganometallic Chemistry 18: A Theoretical DFT Study on the Mechanism of a Novel, Regioselective, Intramolecular N- $\pi$  Rearrangement of Cis and Trans- $\eta^1$ -N-Cp\*Rh-Hydroxytamoxifen Complexes to their  $\eta^6$  Derivatives; Potential Breast Cancer Pharmaceuticals, and Fluorescent Probes

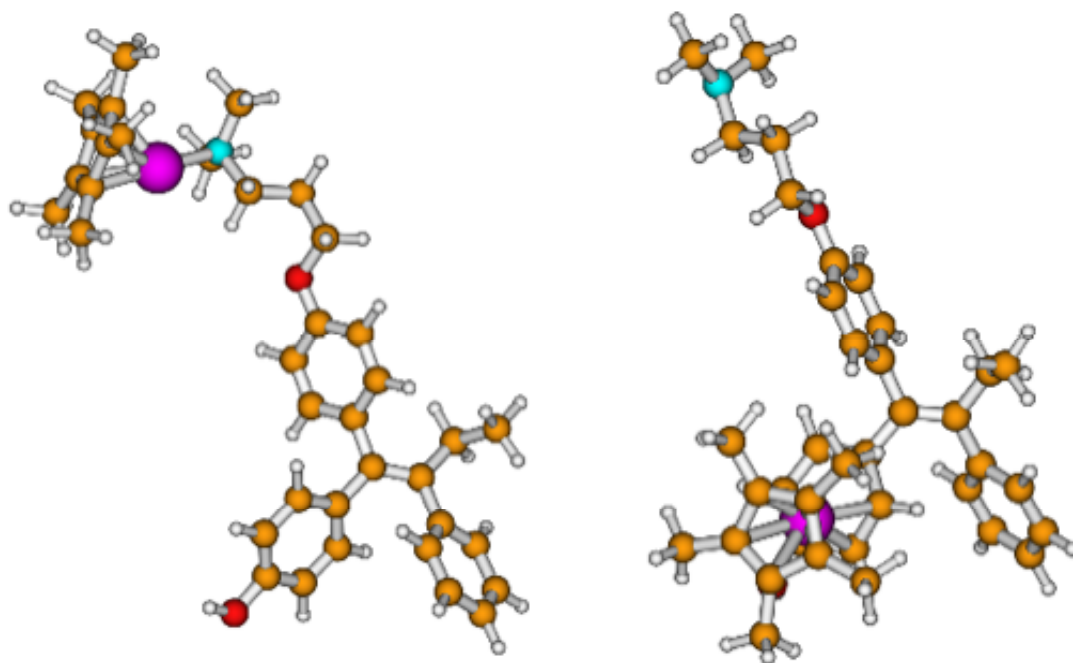

Figure 1S. Optimized geometries of  $[\eta^1\text{-N-Cp}^*\text{Rh}]^{2+}$  (left) and  $[\eta^6\text{-Cp}^*\text{Rh}]^{2+}$  (right) dications in the *trans* configuration.

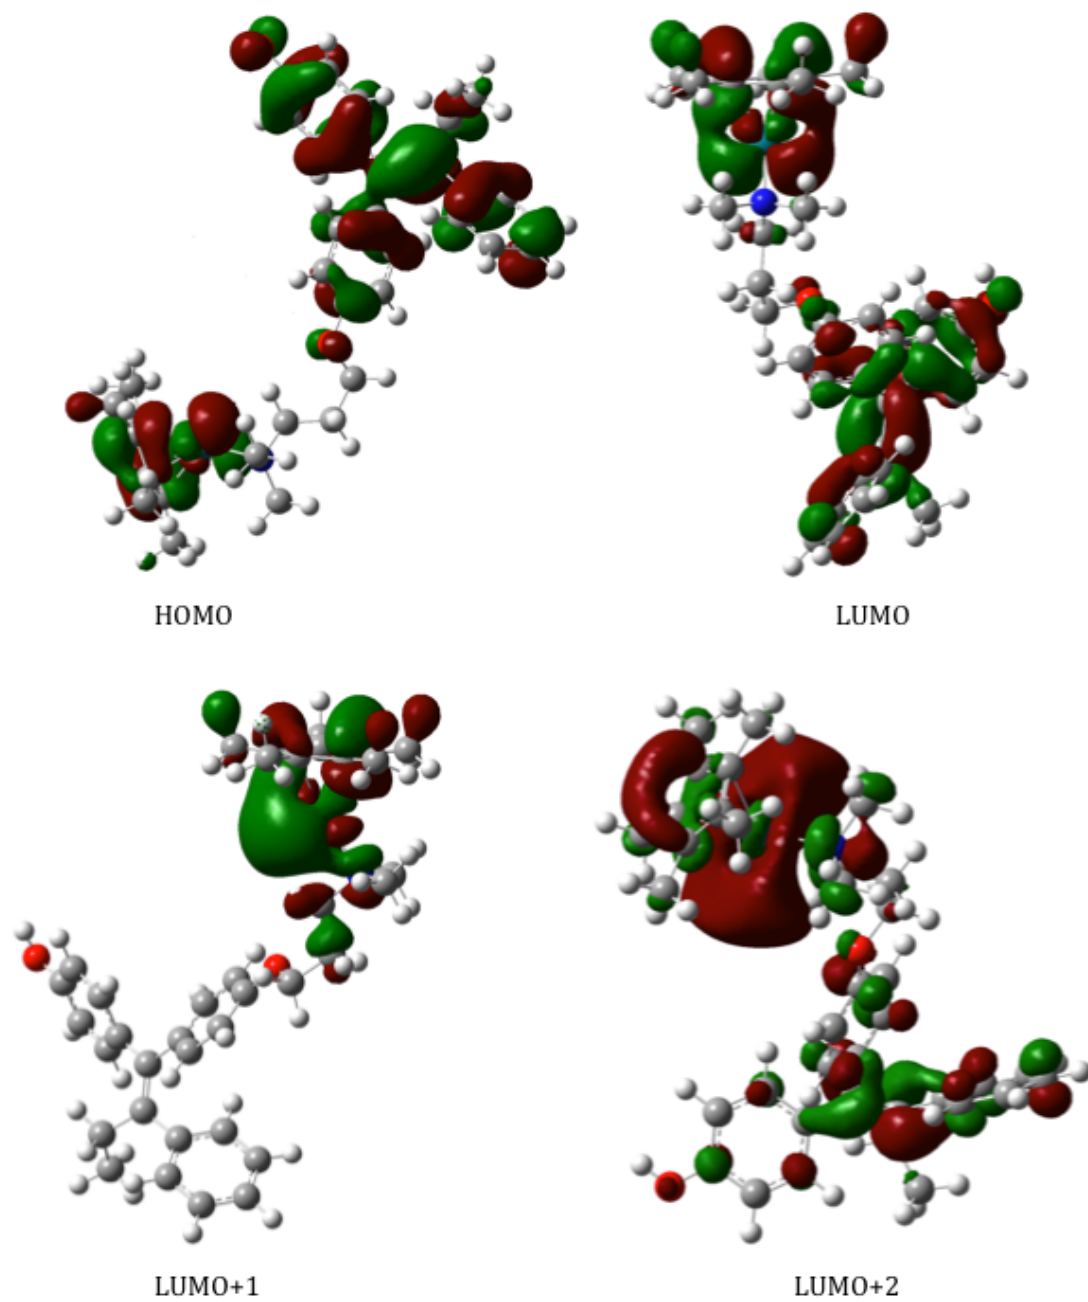

Figure 2S. Density maps of the frontier orbitals in the *cis*  $[\eta^1\text{-N-Cp}^*\text{Rh}]^{2+}$  complex.
